# Supplementary material for: Adenoma to Colorectal Cancer Estimated Transition Rates Stratified by BMI Categories—A Cross-Sectional Analysis of Asymptomatic Individuals from Screening Colonoscopy Program
Source: MDPI journal article supplement (doi:10.3390/cancers14010062), 2021-12-23
Supplement: s1 [file s1]

# Adenoma to Colorectal Cancer Estimated Transition Rates Stratified by BMI Categories – A Cross-Sectional Analysis of Asymptomatic Individuals from Screening Colonoscopy Program.

Piotr Spychalski, Jarek Kobiela, Paulina Wieszczy, Marek Bugajski, Jarosław Reguła and Michał F. Kamiński

**Table S1.** Transition rates with 95% confidence intervals.

| <i>nAA → AA</i>           | <i>eTR</i> | <i>95% CI</i> |
|---------------------------|------------|---------------|
| <i>Normal BMI</i>         | 42.65%     | 40.97-44.39   |
| <i>Overweight</i>         | 41.81%     | 40.51-43.15   |
| <i>Obese</i>              | 44.95%     | 43.10-46.86   |
| <b><i>AA → eCRC</i></b>   |            |               |
| <i>Normal BMI</i>         | 9.02%      | 7.86-10.30    |
| <i>Overweight</i>         | 7.67%      | 6.82-8.59     |
| <i>Obese</i>              | 8.39%      | 7.23-9.69     |
| <b><i>eCRC → aCRC</i></b> |            |               |
| <i>Normal BMI</i>         | 73.73%     | 62.75-86.08   |
| <i>Overweight</i>         | 69.90%     | 60.74-80.05   |
| <i>Obese</i>              | 50.54%     | 40.84-61.85   |
